## **The contribution of psychiatric risk alleles to a general liability to psychopathology in early life**

Lucy Riglin<sup>1\*</sup>, Ajay K Thapar<sup>1</sup>, Beate Leppert<sup>2</sup>, Joanna Martin<sup>1</sup>, Alexander Richards<sup>1</sup>, Richard Anney<sup>1</sup>, George Davey Smith<sup>2</sup>, Kate Tilling<sup>2</sup>, Evie Stergiakouli<sup>2,3</sup>, Benjamin B. Lahey<sup>4</sup>, Michael C O'Donovan<sup>1</sup>, Stephan Collishaw<sup>1</sup>, Anita Thapar<sup>1\*</sup>

\*Corresponding authors. Division of Psychological Medicine and Clinical Neurosciences, Cardiff University School of Medicine, Hadyr Ellis Building, Maindy Road, Cathays, Cardiff CF24 4HQ.  
Tel: +442920688325. Email: [thapar@cardiff.ac.uk](mailto:thapar@cardiff.ac.uk); [riglinl@cardiff.ac.uk](mailto:riglinl@cardiff.ac.uk)

<sup>1</sup> Division of Psychological Medicine and Clinical Neurosciences, MRC Centre for Neuropsychiatric Genetics and Genomics, Cardiff University, UK

<sup>2</sup> MRC Integrative Epidemiology Unit, University of Bristol, Bristol, UK

<sup>3</sup> Oral and Dental Sciences, University of Bristol, Bristol, UK

<sup>4</sup> University of Chicago

## **Abstract.**

*Background.* Psychiatric disorders show phenotypic as well as genetic overlaps. Factor analyses of child and adult psychopathology have found that phenotypic overlaps can be largely explained by a latent general factor that reflects general liability to psychopathology. We investigated whether shared genetic liability across disorders would be reflected in associations between multiple different psychiatric polygenic risk scores (PRS) and a ‘general psychopathology’ factor in childhood.

*Methods.* The sample was a UK, prospective, population-based cohort (ALSPAC), including data on psychopathology at ages 7 (N=8161) and 13 (N=7017) years. PRS were generated from large published genome-wide association studies.

*Results.* A general psychopathology factor was associated with both schizophrenia PRS and attention-deficit/hyperactivity disorder (ADHD) PRS, whereas there was no strong evidence of association for major depressive disorder (MDD) and autism spectrum disorder PRS.

Schizophrenia and MDD PRS also showed association with a specific emotional problems factor and ADHD PRS were associated with a specific neurodevelopmental factor.

*Conclusions.* Our findings suggest that common variant genetic liability to schizophrenia and ADHD may contribute to shared genetic risks across childhood psychiatric diagnoses at least partly via association with a ‘general psychopathology’ factor, whereas genetic liability for MDD appears to contribute more specifically to an emotional factor in childhood.

## Introduction

Most psychiatric disorders originate early in development. Family and twin studies show that these disorders are heritable and many share genetic risk factors across diagnostic categories. For example, registry-based family and twin studies suggest that relatives of those with schizophrenia, mood disorders, autism spectrum disorder (ASD) and attention-deficit/hyperactivity disorder (ADHD) are at elevated risks for a broad range of psychopathology; not just for the same disorder as the affected probands (1, 2). Recent molecular genetic studies also provide evidence of common variant genetic overlaps between different psychiatric disorders (3-5); for example genetic correlations across schizophrenia, mood disorders, ASD and ADHD have been shown to range from 0.30 to 0.93 (6). Current psychiatric nosology does not take into account these complex patterns of shared inheritance across phenotypes (7).

While the genetic architecture of psychiatric disorders is complex, indicators of (common variant) genetic liability for psychiatric disorders including schizophrenia, depression, ASD and ADHD can be measured in individuals using polygenic risk scores (PRS) (8). Studies using this method also support the existence of shared genetic risks. For example, schizophrenia PRS are associated with increased liability to other disorders (including major depression, anxiety, ASD, and ADHD) and broader categories of psychiatric phenotypes (e.g. neurodevelopmental traits in childhood) (9, 10). Although it is now widely accepted that psychiatric disorder risk alleles are shared across disorders, how such risks have a shared impact on psychopathology remains unknown.

While different forms of psychopathology are considered as discrete categories for clinical purposes, it has long been known that different disorders show strong phenotypic (as well as genetic) overlaps. Factor analyses of child and adult psychopathology have observed that these phenotypic overlaps are largely explained by a latent general factor that reflects general liability to psychopathology (3, 11). Different disorders are distinguished by additional specific or unique factors. For example, factor analyses of psychiatric disorders in children have typically

observed evidence for specific emotional (internalizing) and behavioral (externalizing) factors as well as a general psychopathology factor. In adulthood, recent studies have also highlighted the presence of a specific ‘thought disorder’ factor, as well as emotional, behavioral and general psychopathology factors (11). However, it is not clear where the DSM-5 neurodevelopmental disorders of ADHD and ASD fit: they have tended to either be excluded from these studies - or in the case of ADHD, often considered as an externalizing disorder (e.g. 3) - rather than modelled as a separate neurodevelopmental factor as would be predicted by DSM-5 classifications.

In this study, we set out to examine the structure of psychopathology in childhood and early adolescence in a population-based birth cohort, including broadly defined ASD and ADHD problems as well as emotional and behavioral difficulties that have been included in previous studies: we hypothesized that we would identify a neurodevelopmental factor as well as emotional and behavioral factors. We also aimed to examine associations between psychiatric risk alleles, indexed by PRS, and a ‘general psychopathology’ factor. We investigated psychiatric PRS derived from large, publicly available genome-wide association studies that have previously been shown to be associated with childhood psychopathology (12-15): schizophrenia, major depressive disorder (MDD), ASD and ADHD. We hypothesized that shared genetic liability across disorders would be reflected in associations between these multiple PRS and a general psychopathology factor, and that PRS would show additional “within phenotype” associations with specific factors: MDD PRS with an emotional factor; ASD and ADHD PRS with a neurodevelopmental factor. Given emerging evidence for developmental changes in the genetic architecture of psychopathology (16), we assessed associations at two time points (ages 7 and 13 years).

## **Methods and Materials**

### *Sample*

The Avon Longitudinal Study of Parents and Children (ALSPAC) is a well-established prospective, longitudinal birth cohort study. The enrolled core sample consisted of 14,541

mothers living in Avon, England, who had expected delivery dates of between 1<sup>st</sup> April 1991 and 31<sup>st</sup> December 1992. Of these pregnancies 13,988 children were alive at 1 year. When the oldest children were approximately 7 years of age, the sample was augmented with eligible cases who had not joined the study originally, resulting in enrollment of 713 additional children. The resulting total sample size of children alive at 1 year was N=14,701. Genotype data were available for 8,365 children following quality control. Ethical approval for the study was obtained from the ALSPAC Ethics and Law Committee and the Local Research Ethics Committees. Full details of the study, measures and sample can be found elsewhere (17, 18). Please note that the study website contains details of all the data that is available through a fully searchable data dictionary (<http://www.bris.ac.uk/alspac/researchers/data-access/data-dictionary>). Where families included multiple births, we included the oldest sibling.

#### *Polygenic risk scores*

Polygenic risk scores (PRS) were generated as the weighted mean number of disorder risk alleles in approximate linkage equilibrium, derived from imputed autosomal SNPs using PRSice (19). Scores were standardized using Z-score transformation: results can therefore be interpreted as an increase per 1 standard deviation increase in PRS. Risk alleles were defined as those associated with case-status in recent large consortia analyses of schizophrenia (40,675 cases and 64,643 controls) (20), MDD (135,458 cases and 344,901 controls) (21), ASD (18,381 cases and 27,969 controls) (22), and ADHD (19,099 cases and 34,194 controls) (23). In the primary analyses we defined risk alleles as those associated at  $p < 0.05$  as this threshold has previously been shown to maximally capture phenotypic variance for schizophrenia (10); associations across a range of p-thresholds are shown in Supplementary Figure 2 in the online data supplement. Genotyping details as well as full methods for generating the PRS are presented in the Supplementary Material. PRS were available for 67% of individuals (N=6166/9179) with phenotypic data at age 7 and/or 13 years. Sensitivity analyses were conducted using inverse probability weighting (24) to assess the impact of missing genetic data (see Supplementary Material).

### *Outcomes*

Psychopathology was assessed using parent reports at the approximate ages of 7/8 and 13 years old. Emotional problems were assessed using the Development and Well-Being Assessment (DAWBA) (25) (individual item range 0-2) for depression (12 items), generalized anxiety (7 items), separation anxiety (10 items), social anxiety (6 items), specific phobia (7 items) and irritability (3 items) (in-line with the DSM-5 classification of disruptive mood dysregulation disorder as a mood disorder). Behavioral problems were assessed using the DAWBA for conduct disorder (7 items) and the two established behavioral components of oppositional defiant disorder: headstrong (4 items) and hurtful (2 items) behaviors. Neurodevelopmental problems were assessed using the DAWBA for activity/impulsivity (9 items) and inattention (9 items) for ADHD problems. Additionally, the Social and Communication Disorders Checklist (26) was used for social-communication problems related to ASD (12 items; individual item range 0-2). Prorated scores (the mean score multiplied by total possible number of items in the scale) were calculated for individuals with <30% missingness. Descriptive statistics and correlations between variables are given in Supplementary Tables 1 and 2.

### *Analysis*

In-line with previous work, we first used confirmatory factor analysis to identify the best fitting model for psychopathology, comparing a correlated-factors model (specific factors only), a bifactor model (specific factors and a general psychopathology factor: correlations between factors fixed to zero) and a one factor model (a general psychopathology factor only) at each time point (see Supplementary Material for full details). Associations with PRS were examined in two steps: factors were fixed based on the best fitting model before associations with PRS were examined (i.e. PRS did not impact on the factor structure). Schizophrenia, MDD, ASD and ADHD PRS were included simultaneously (as were all factors within a given model) in a single test for each factor model. Analyses were conducted in Mplus using a maximum likelihood parameter estimator for which standard errors are robust to non-normality (MLR) (27).

## Results

A correlated factors model suggested that three 'specific' emotional, behavioral and neurodevelopmental factors (Figure 1a and Table 1) fit the data well, but the addition of a general psychopathology factor in the bifactor model (Figure 1b and Table 1) showed improvement in model fit (see Supplementary Material for full details and explanation of model fitting). Associations for both models are reported to assess the impact of including a general psychopathology factor.

Within the correlated factors model, female sex was positively associated with the emotional factor (age 7:  $\beta=0.024$ , SE=0.01,  $p=0.014$ ; age 13:  $\beta=0.108$ , SE=0.011,  $p<0.001$ ) and negatively associated with the behavioral (age 7:  $\beta=-0.042$ , SE=0.007,  $p<0.001$ ; age 13:  $\beta=-0.008$ , SE=0.009,  $p=0.337$ ) and neurodevelopmental (age 7:  $\beta=-0.085$ , SE=0.007,  $p<0.001$ ; age 13:  $\beta=-0.066$ , SE=0.008,  $p<0.001$ ) factors.

Within the bifactor model, female sex was negatively associated with the general psychopathology factor (age 7:  $\beta=-0.053$ , SE=0.009,  $p<0.001$ ; age 13:  $\beta=-0.038$ , SE=0.010,  $p<0.001$ ), positively associated with the emotional (age 7:  $\beta=0.057$ , SE=0.011,  $p<0.001$ ; age 13:  $\beta=0.144$ , SE=0.011,  $p<0.001$ ) and behavioral (age 7:  $\beta=0.013$ , SE=0.016,  $p=0.430$ ; age 13:  $\beta=0.054$ , SE=0.014,  $p<0.001$ ) factors and negatively associated with the neurodevelopmental factor (age 7:  $\beta=-0.075$ , SE=0.011,  $p<0.001$ ; age 13:  $\beta=-0.067$ , SE=0.011,  $p<0.001$ ).

Correlations between factors at ages 7 and 13 suggested strong phenotypic stability in the factor structure of psychopathology between childhood and early adolescence (bifactor: general psychopathology  $r=0.763$ , emotional factor  $r=0.771$ , behavioral factor  $r=0.817$ , neurodevelopmental factor  $r=0.711$ ; see Supplementary Table 6).

### *Genetic risk*

Results of multivariable PRS associations with the psychopathology factors are shown in Table 2. At both ages the general psychopathology factor (bifactor model) was associated with both

schizophrenia PRS and ADHD PRS, whereas there was no strong evidence for associations with MDD and ASD PRS.

In the correlated factors model, schizophrenia PRS were associated with all three specific factors at age 7. In the bifactor model – with the inclusion of a general factor – there was no strong evidence of associations between schizophrenia PRS with the specific factors, with the exception of the emotional factor. At age 13 the same pattern was found for behavioral and neurodevelopmental problems, but there was no strong evidence of associations with emotional problems.

MDD PRS were specifically associated with emotional problems both in the correlated factors models and the bifactor model. There was no strong evidence of associations between ASD PRS and any of the factors at either age. Finally, ADHD PRS were specifically associated with behavioral and neurodevelopmental problems in the correlated factors models at both ages. With the inclusion of a general factor in the bifactor model, there was no strong evidence of association with the specific factors, with the exception of neurodevelopmental problems.

#### *Sensitivity analyses*

Entering PRS in univariable (instead of multivariable) analyses revealed a similar pattern of results, with the exception that there was also some evidence of association between MDD PRS and general psychopathology when the other PRS were not included in the model (age 7  $\beta=0.041$ ,  $SE=0.017$ ,  $p=0.017$ ; age 13  $\beta=0.031$ ,  $SE=0.017$ ,  $p=0.067$ , see Supplementary Table 7 for full results). Associations for schizophrenia, ASD and ADHD PRS were consistent regardless of whether or not the other PRS were controlled for.

Using inverse probability weighting to assess the impact of missing genetic data revealed a similar pattern of results (see Supplementary Material).

## **Discussion**

In this study we set out to examine the structure of psychopathology in childhood and early adolescence and to investigate the contribution of psychiatric risk alleles to underlying latent



psychopathology factors. In line with previous work, we identified a general psychopathology factor underlying all forms of psychopathology (3, 11, 28). Our models also included emotional, behavioral and neurodevelopmental problems, supporting the DSM-5 classification in distinguishing a neurodevelopmental factor from both emotional and behavioral factors.

This study examined the hypothesis that shared genetic liability across disorders would be reflected in associations between multiple disorder PRS and a general psychopathology factor. This hypothesis was partially supported: schizophrenia and ADHD PRS were associated with a general psychopathology factor in childhood but MDD and ASD PRS were not. Results for each PRS are discussed in detail below.

For schizophrenia PRS, results supported our hypothesis that shared genetic risks – in this case between schizophrenia and childhood emotional, behavioral and neurodevelopmental problems - are at least partly explained by genetic risk for general psychopathology. Several studies have now reported associations between schizophrenia PRS and psychopathology as well as IQ and social traits from early childhood onwards (9, 12, 16, 29, 30). Our findings suggest that schizophrenia genetic liability may be associated with these childhood impairments via a general liability to psychopathology. This is consistent with previous suggestions that risk for rarer forms of psychopathology, including schizophrenia, is also associated with (non-specific) risk for common psychopathology dimensions via the general factor (31). Beyond this general factor, there was evidence for association between schizophrenia PRS and childhood emotional problems at age 7 years but this was not found at age 13 years.

We also found ADHD PRS to be associated with the general psychopathology factor as well as with the specific neurodevelopmental factor - consistent with another population-based study that found associations between ADHD PRS and a latent factor encompassing emotional, behavioral and neurodevelopmental problems in Swedish children aged 9-12 years (15). This suggests that while shared genetic overlap between ADHD and some forms of psychopathology may be due to association with a general liability, there is also some specificity in associations with neurodevelopmental problems.

ASD PRS, in contrast to expectations, were not associated with the general factor or the neurodevelopmental factor. Previous work in the same sample has found associations between ASD PRS and social-communication (one of our indices of neurodevelopmental problems) at age 7 years (13, 32) but our findings suggest that ASD common variants (at least based on currently available GWAS discovery sample sizes) do not predict a common liability to a broader (latent) measure of neurodevelopmental problems. This is somewhat surprising given that family and twin studies, the latest GWAS (genome-wide association study) of patient samples and studies of rare genetic mutations all suggest considerable genetic overlap between ASD and ADHD diagnoses (33). We speculate that this is likely in part due to the still relatively small ASD discovery GWAS and the typically weaker associations with trait measures than diagnoses. Finally, MDD PRS were not associated with the general factor - sensitivity analyses provided some evidence of association but this attenuated in the multivariable analyses, suggesting that this effect was not independent of the other psychiatric disorder PRS. MDD PRS were independently associated with an emotional problems factor, particularly at age 13 years. Previous work in another UK cohort found MDD PRS to be associated with emotional problems in adulthood but not in childhood (16). The findings in this cohort might differ because we investigated latent factors and included more anxiety measures or because we used a more powerful (larger) MDD discovery sample.

Our findings should be considered in light of a number of limitations. First, the sample is a longitudinal birth cohort study that suffers from non-random attrition, whereby children with higher PRS and higher levels of psychopathology are more likely to drop out of the study (34, 35). Second, our models were statistically driven - although theoretically informed - and are therefore dependent on the properties of the measures that are included in the models; while our bifactor model was the best fitting model that we tested, this does not mean that this is the best possible model. We restricted our measures to parent-rated problems given the ages of the children and to avoid changes in instrument and rater across age. Finally, it is also important to note that PRS currently only explain a small proportion of genetic liability to psychiatric

disorders (10) and that environmental risk factors and shared symptoms (as well as other non-common, non-additive genetic factors not captured by existing PRS) will also contribute to phenotypic overlaps (3).

### **Conclusion**

Our results suggest that at both ages 7 and 13 years schizophrenia and ADHD PRS may contribute to shared genetic risks across psychiatric diagnostic categories at least partly via association with a 'general psychopathology' factor, whereas genetic liability for MDD appears to contribute to a specific emotional factor in childhood, indexing depression and anxiety disorder symptoms.

**Acknowledgements.** We acknowledge the members of the Psychiatric Genomics Consortium for the publicly available data used as the discovery samples in this article. We thank the research participants and employees of 23andMe, Inc. for their contribution to this study. We thank all the families who took part in this study, the midwives for their help in recruiting them, and the entire Avon Longitudinal Study of Parents and Children team, which includes interviewers, computer and laboratory technicians, clerical workers, research scientists, volunteers, managers, receptionists, and nurses. The UK Medical Research Council, grant 102215/2/13/2 from the Wellcome Trust, and the University of Bristol provide core support for the Avon Longitudinal Study of Parents and Children. Genome-wide association study data were generated by Sample Logistics and Genotyping Facilities at the Wellcome Trust Sanger Institute and Laboratory Corporation of America using support from 23andMe. This study was supported by the Wellcome Trust (204895/Z/16/Z). Dr Martin was supported by the Wellcome Trust (Grant No: 106047).

**Conflict of Interest Disclosures:** None.

## References

1. Larsson H, Ryden E, Boman M, Langstrom N, Lichtenstein P, Landen M (2013): Risk of bipolar disorder and schizophrenia in relatives of people with attention-deficit hyperactivity disorder. *Br J Psychiatry*. 203:103-106.
2. Sullivan P, Magnusson C, Reichenberg A, Boman M, Dalman C, Davidson M, et al. (2012): Family history of schizophrenia and bipolar disorder as risk factors for autism. *Arch Gen Psychiatry*. 69:1099-1103.
3. Lahey BB, Van Hulle CA, Singh AL, Waldman ID, Rathouz PJ (2011): Higher-order genetic and environmental structure of prevalent forms of child and adolescent psychopathology. *Arch Gen Psychiatry*. 68:181-189.
4. Bulik-Sullivan B, Finucane HK, Anttila V, Gusev A, Day FR, Loh P-R, et al. (2015): An atlas of genetic correlations across human diseases and traits. *Nature genetics*. 47:1236-1241.
5. Cross-Disorder Group of the Psychiatric Genomics Consortium (2013): Genetic relationship between five psychiatric disorders estimated from genome-wide SNPs. *Nature Genetics*. 45:984-994.
6. Schork AJ, Won H, Appadurai V, Nudel R, Gandal M, Delaneau O, et al. (2017): A genome-wide association study for shared risk across major psychiatric disorders in a nation-wide birth cohort implicates fetal neurodevelopment as a key mediator. *bioRxiv*.
7. Doherty JL, Owen MJ (2014): Genomic insights into the overlap between psychiatric disorders: implications for research and clinical practice. *Genome Medicine*. 6:29.
8. Sullivan PF, Agrawal A, Bulik CM, Andreassen OA, Børglum AD, Breen G, et al. (2018): Psychiatric Genomics: An Update and an Agenda. *Am J Psychiatr*. 175:15-27.
9. Riglin L, Collishaw S, Richards A, Thapar A, Maughan B, O'Donovan M, et al. (2017): Schizophrenia risk alleles and neurodevelopmental outcomes in childhood: a population-based cohort study. *Lancet Psychiatry*. 4:57-62.
10. Schizophrenia Working Group of the Psychiatric Genomics Consortium (2014): Biological insights from 108 schizophrenia-associated genetic loci. *Nature*. 511:421-427.
11. Caspi A, Houts RM, Belsky DW, Goldman-Mellor SJ, Harrington H, Israel S, et al. (2014): The p factor: One general psychopathology factor in the structure of psychiatric disorders? *Clinical Psychological Science*. 2:119-137.
12. Poletti M, Raballo A (2018): Polygenic Risk Score and the (neuro)developmental ontogenesis of the schizophrenia spectrum vulnerability phenotypes. *Schizophr Res*.
13. St Pourcain B, Robinson EB, Anttila V, Sullivan BB, Maller J, Golding J, et al. (2017): ASD and schizophrenia show distinct developmental profiles in common genetic overlap with population-based social communication difficulties. *Mol Psychiatry*. 23:263-270.
14. Rice F, Riglin L, Thapar A, Heron J, Anney R, MC OD, et al. ((under review)): Early onset depression: characterising developmental trajectories and the role of neuropsychiatric genetic risk variants.
15. Brikell I, Larsson H, Lu Y, Pettersson E, Chen Q, Kuja-Halkola R, et al. (2018): The contribution of common genetic risk variants for ADHD to a general factor of childhood psychopathology. *Mol Psychiatr*.
16. Riglin L, Collishaw S, Richards A, Thapar AK, Rice F, Maughan B, et al. (2017): The impact of schizophrenia and mood disorder risk alleles on emotional problems: investigating change from childhood to middle age. *Psychol Med*. 1-6.
17. Boyd A, Golding J, Macleod J, Lawlor DA, Fraser A, Henderson J, et al. (2013): Cohort Profile: The 'Children of the 90s'-the index offspring of the Avon Longitudinal Study of Parents and Children. *International journal of epidemiology*. 42:111-127.
18. Fraser A, Macdonald-Wallis C, Tilling K, Boyd A, Golding J, Davey Smith G, et al. (2013): Cohort Profile: The Avon Longitudinal Study of Parents and Children: ALSPAC mothers cohort. *International journal of epidemiology*. 42:97-110.
19. Euesden J, Lewis CM, O'Reilly PF (2015): PRSice: Polygenic Risk Score software. *Bioinformatics*. 31:1466-1468.

20. Pardinas AF, Holmans P, Pocklington AJ, Escott-Price V, Ripke S, Carrera N, et al. (2018): Common schizophrenia alleles are enriched in mutation-intolerant genes and in regions under strong background selection. *Nat Genet.* 50:381-389.
21. Wray NR, Ripke S, Mattheisen M, Trzaskowski M, Byrne EM, Abdellaoui A, et al. (2018): Genome-wide association analyses identify 44 risk variants and refine the genetic architecture of major depression. *Nat Genet.* 50:668-681.
22. Grove J, Ripke S, Als TD, Mattheisen M, Walters R, Won H, et al. (2017): Common risk variants identified in autism spectrum disorder. *bioRxiv.*
23. Demontis D, Walters RK, Martin J, Mattheisen M, Als TD, Agerbo E, et al. (2017): Discovery Of The First Genome-Wide Significant Risk Loci For ADHD. *bioRxiv.*
24. Seaman SR, White IR (2013): Review of inverse probability weighting for dealing with missing data. *Stat Methods Med Res.* 22:278-295.
25. Goodman R, Ford T, Richards H, Gatward R, Meltzer H (2000): The Development and Well-Being Assessment: Description and initial validation of an integrated assessment of child and adolescent psychopathology. *Journal of Child Psychology and Psychiatry.* 41:645-655.
26. Skuse DH, Mandy WP, Scourfield J (2005): Measuring autistic traits: heritability, reliability and validity of the Social and Communication Disorders Checklist. *The British Journal of Psychiatry.* 187:568-572.
27. Muthén LK, Muthén BO (1998-2012): *Mplus User's Guide.* Seventh ed. Los Angeles, CA: Muthén & Muthén.
28. Eoin M, Jay B, Natacha C, Pasco F, Praveetha P (2018): Developmental stability of general and specific factors of psychopathology from early childhood to adolescence: dynamic mutualism or p-differentiation? *Journal of Child Psychology and Psychiatry.* 59:667-675.
29. R. JP, J.C. PT, Koen B, Jan E, W.V. JV, C. VF, et al. (2018): Polygenic scores for schizophrenia and educational attainment are associated with behavioural problems in early childhood in the general population. *Journal of Child Psychology and Psychiatry.* 59:39-47.
30. Nivard MG, Gage SH, Hottenga JJ, van Beijsterveldt CE, Abdellaoui A, Bartels M, et al. (2017): Genetic Overlap Between Schizophrenia and Developmental Psychopathology: Longitudinal and Multivariate Polygenic Risk Prediction of Common Psychiatric Traits During Development. *Schizophr Bull.* 6:1197-1207.
31. Lahey BB, Krueger RF, Rathouz PJ, Waldman ID, Zald DH (2017): A hierarchical causal taxonomy of psychopathology across the life span. *Psychol Bull.* 143:142-186.
32. Stergiakouli E, Davey Smith G, Martin J, Skuse DH, Viechtbauer W, Ring SM, et al. (2017): Shared genetic influences between dimensional ASD and ADHD symptoms during child and adolescent development. *Molecular Autism.* 8:18.
33. Rommelse NN, Franke B, Geurts HM, Hartman CA, Buitelaar JK (2010): Shared heritability of attention-deficit/hyperactivity disorder and autism spectrum disorder. *Eur Child Adolesc Psychiatry.* 19:281-295.
34. Martin J, Tilling K, Hubbard L, Stergiakouli E, Thapar A, Smith GD, et al. (2016): Association of Genetic Risk for Schizophrenia With Nonparticipation Over Time in a Population-Based Cohort Study. *Am J Epidemiol.* 183:1149-1158.
35. Wolke D, Waylen A, Samara M, Steer C, Goodman R, Ford T, et al. (2009): Selective drop-out in longitudinal studies and non-biased prediction of behaviour disorders. *The British Journal of Psychiatry.* 195:249-256.

**Figure 1A.** Correlated factors model

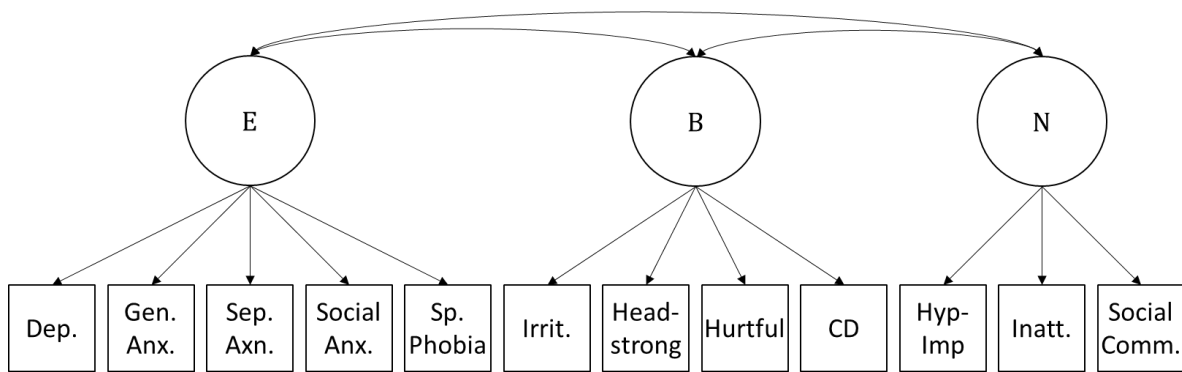

**Figure 1B.** Bifactor model

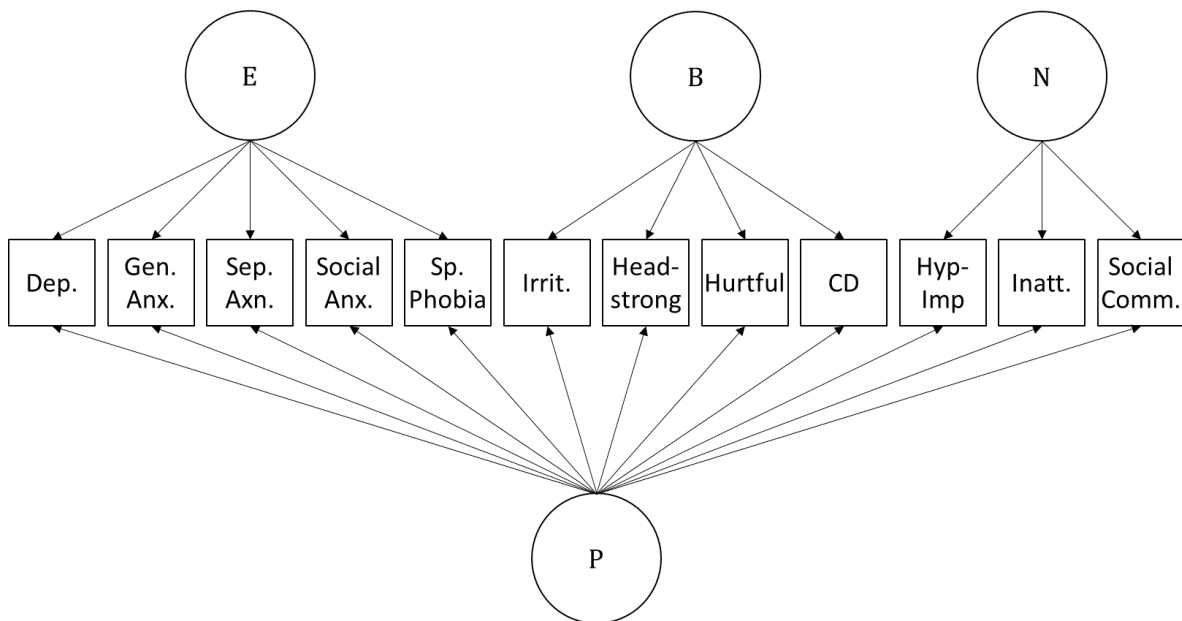

E=emotional, B=behavioral, N=neurodevelopmental, P = general psychopathology,  
Dep=depression, Gen=Generalized, Anx=anxiety, Sep=separation, Sp=Specific, Irrit=irritability,  
CD=conduct disorder, Hyp-imp=Hyperactivity/impulsivity, Inatten=Inattentive,  
Comm=communication.

**Table 1.** Factor loadings and correlations

|                           | Age 7                    |       |       |                |        |       |       | Age 11                   |       |       |                |       |       |       |
|---------------------------|--------------------------|-------|-------|----------------|--------|-------|-------|--------------------------|-------|-------|----------------|-------|-------|-------|
|                           | Correlated factors model |       |       | Bifactor model |        |       |       | Correlated factors model |       |       | Bifactor model |       |       |       |
| Factor loadings           | E                        | B     | N     | E              | B      | N     | P     | E                        | B     | N     | E              | B     | N     | P     |
| Depression                | 0.441                    |       |       | 0.311          |        |       | 0.292 | 0.499                    |       |       | 0.303          |       |       | 0.394 |
| Generalized anxiety       | 0.583                    |       |       | 0.565          |        |       | 0.229 | 0.630                    |       |       | 0.663          |       |       | 0.219 |
| Separation anxiety        | 0.599                    |       |       | 0.500          |        |       | 0.296 | 0.535                    |       |       | 0.435          |       |       | 0.270 |
| Social anxiety            | 0.449                    |       |       | 0.402          |        |       | 0.206 | 0.455                    |       |       | 0.362          |       |       | 0.248 |
| Specific phobia           | 0.446                    |       |       | 0.448          |        |       | 0.157 | 0.446                    |       |       | 0.498          |       |       | 0.105 |
| Irritability              |                          | 0.824 |       |                | 0.412  |       | 0.734 |                          | 0.871 |       |                | 0.445 |       | 0.760 |
| Headstrong                |                          | 0.915 |       |                | 0.366  |       | 0.827 |                          | 0.924 |       |                | 0.447 |       | 0.803 |
| Hurtful                   |                          | 0.708 |       |                | 0.340  |       | 0.627 |                          | 0.702 |       |                | 0.349 |       | 0.610 |
| Conduct disorder          |                          | 0.512 |       |                | -0.013 |       | 0.560 |                          | 0.553 |       |                | 0.075 |       | 0.579 |
| Hyperactivity/impulsivity |                          |       | 0.857 |                |        | 0.540 | 0.694 |                          |       | 0.761 |                |       | 0.620 | 0.633 |
| Inattention               |                          |       | 0.787 |                |        | 0.566 | 0.605 |                          |       | 0.758 |                |       | 0.410 | 0.650 |
| Social-communication      |                          |       | 0.801 |                |        | 0.207 | 0.791 |                          |       | 0.801 |                |       | 0.109 | 0.804 |
| Factor correlations       | E                        | B     | N     | E              | B      | N     | P     | E                        | B     | N     | E              | B     | N     | P     |
| Emotional                 | 1                        |       |       | 1              |        |       |       | 1                        |       |       | 1              |       |       |       |
| Behavioral                | 0.424                    | 1     |       | 0              | 1      |       |       | 0.391                    | 1     |       | 0              | 1     |       |       |
| Neurodevelopmental        | 0.413                    | 0.766 | 1     | 0              | 0      | 1     |       | 0.455                    | 0.795 | 1     | 0              | 0     | 1     |       |
| General psychopathology   |                          |       |       | 0              | 0      | 0     | 1     |                          |       |       | 0              | 0     | 0     | 1     |

E=emotional, B=behavioral, N=neurodevelopmental, P=general psychopathology. Factor correlations fixed to zero in the bifactor model.



**Table 2.** Multivariable associations between genetic risk and the factor models model

|                             | Schizophrenia PRS |       |        | MDD PRS |       |       | ASD PRS |       |       | ADHD PRS |       |        | Total R <sup>2</sup> |
|-----------------------------|-------------------|-------|--------|---------|-------|-------|---------|-------|-------|----------|-------|--------|----------------------|
|                             | $\beta$           | SE    | p      | $\beta$ | SE    | p     | $\beta$ | SE    | p     | $\beta$  | SE    | p      |                      |
| Age 7 years (N=5518)        |                   |       |        |         |       |       |         |       |       |          |       |        |                      |
| Correlated factor model     |                   |       |        |         |       |       |         |       |       |          |       |        |                      |
| Emotional problems          | 0.055             | 0.017 | 0.001  | 0.038   | 0.017 | 0.025 | 0.004   | 0.017 | 0.822 | -0.003   | 0.018 | 0.851  | 0.005                |
| Behavioral problems         | 0.042             | 0.014 | 0.003  | 0.016   | 0.014 | 0.255 | -0.010  | 0.014 | 0.478 | 0.061    | 0.014 | <0.001 | 0.006                |
| Neurodevelopmental problems | 0.038             | 0.015 | 0.009  | 0.019   | 0.015 | 0.184 | -0.006  | 0.014 | 0.677 | 0.089    | 0.015 | <0.001 | 0.010                |
| Bifactor model              |                   |       |        |         |       |       |         |       |       |          |       |        |                      |
| Emotional problems          | 0.042             | 0.019 | 0.025  | 0.032   | 0.019 | 0.092 | 0.006   | 0.019 | 0.744 | -0.050   | 0.020 | 0.011  | 0.005                |
| Behavioral problems         | 0.019             | 0.028 | 0.492  | -0.018  | 0.028 | 0.511 | -0.018  | 0.029 | 0.531 | -0.059   | 0.030 | 0.051  | 0.005                |
| Neurodevelopmental problems | 0.000             | 0.022 | 0.987  | -0.002  | 0.021 | 0.916 | -0.018  | 0.022 | 0.414 | 0.037    | 0.023 | 0.098  | 0.001                |
| General psychopathology     | 0.041             | 0.017 | 0.017  | 0.025   | 0.017 | 0.134 | 0.000   | 0.018 | 0.995 | 0.088    | 0.018 | <0.001 | 0.011                |
| Age 13 years (N= 4987)      |                   |       |        |         |       |       |         |       |       |          |       |        | R <sup>2</sup>       |
| Correlated factor model     |                   |       |        |         |       |       |         |       |       |          |       |        |                      |
| Emotional problems          | 0.013             | 0.017 | 0.456  | 0.056   | 0.017 | 0.001 | 0.013   | 0.017 | 0.459 | 0.029    | 0.017 | 0.092  | 0.005                |
| Behavioral problems         | 0.033             | 0.014 | 0.024  | 0.009   | 0.014 | 0.535 | -0.011  | 0.014 | 0.432 | 0.077    | 0.015 | <0.001 | 0.007                |
| Neurodevelopmental problems | 0.056             | 0.016 | <0.001 | 0.009   | 0.015 | 0.564 | -0.018  | 0.016 | 0.240 | 0.103    | 0.016 | <0.001 | 0.014                |
| Bifactor model              |                   |       |        |         |       |       |         |       |       |          |       |        |                      |
| Emotional problems          | -0.022            | 0.018 | 0.237  | 0.053   | 0.018 | 0.003 | 0.018   | 0.019 | 0.322 | -0.016   | 0.019 | 0.398  | 0.004                |
| Behavioral problems         | -0.050            | 0.024 | 0.035  | -0.008  | 0.024 | 0.744 | 0.003   | 0.026 | 0.911 | -0.003   | 0.027 | 0.899  | 0.003                |
| Neurodevelopmental problems | -0.021            | 0.022 | 0.349  | -0.014  | 0.021 | 0.519 | -0.012  | 0.022 | 0.591 | 0.063    | 0.023 | 0.005  | 0.004                |
| General psychopathology     | 0.065             | 0.017 | <0.001 | 0.015   | 0.017 | 0.371 | -0.015  | 0.017 | 0.395 | 0.086    | 0.018 | <0.001 | 0.012                |

MDD=major depressive disorder, ASD=autism spectrum disorder, ADHD=attention-deficit/hyperactivity disorder, PRS=polygenic risk score.

Betas represent a 1 standard deviation increase in factor score per 1 standard deviation increase in PRS.
